# Supplementary material for: Quantum-classical effective-modes dynamics of the ππ* → nπ* decay in 9H-adenine. A quadratic vibronic coupling model
Source: Royal Society of Chemistry journal article supplement (doi:10.1039/c3fd20147c), 2013-01-01
Supplement: c3fd20147c.pdf [file c3fd20147c.pdf]

# Quantum-classical effective-modes dynamics of the $\pi\pi^* \rightarrow n\pi^*$ decay in 9H-adenine. A quadratic vibronic coupling model.

## Supporting Information

David Picconi

*Scuola Normale Superiore di Pisa, Piazza dei Cavalieri 7,*

*I-56126 Pisa, Italy and Technische Universität München,*

*Lehrstuhl für Theoretische Chemie, Lichtenbergstraße 4 D-85747 Garching, Germany*

Francisco José Avila Ferrer

*CNR–Consiglio Nazionale delle Ricerche,*

*Istituto di Chimica dei Composti Organo Metallici (ICCOM-CNR),*

*UOS di Pisa, Area della Ricerca, via G. Moruzzi 1, I-56124 Pisa, Italy and*

*University of Málaga, Physical Chemistry,*

*Faculty of Science, Málaga, 29071, Spain*

Roberto Improta

*CNR–Consiglio Nazionale delle Ricerche,*

*Istituto di Biostrutture e Bioimmagini (IBB-CNR),*

*Via Mezzocannone 16, I-80134, Napoli, Italy*

Alessandro Lami and Fabrizio Santoro \*

*CNR–Consiglio Nazionale delle Ricerche,*

*Istituto di Chimica dei Composti Organo Metallici (ICCOM-CNR),*

*UOS di Pisa, Area della Ricerca, via G. Moruzzi 1, I-56124 Pisa, Italy*

(Dated: December 10, 2012)

### A. Quadratic Vibronic Coupling Hamiltonian for wave packet propagation

In order to define the Hamiltonian for the quantum wave packet propagations, we adopt a fully QVC model for the intra-state diabatic potentials ( $W_1$  and  $W_2$ ), and a linear approximation for the diabatic coupling ( $W_{12}$ ). In this work, we adopted an approach denoted

---

\* Corresponding Author: E-mail:fabrizio.santoro@iccom.cnr.it

'adiabatic' in the recent literature, meaning that the point of expansion is the minimum of the PES.

In the following, dimensionless normal coordinates ( $Q_j$ ) will be used. These are related to the usual mass-weighted coordinates ( $Q_j^{(MW)}$ ) by the transformation:  $Q_j = \sqrt{\omega_j/\hbar} Q_j^{(MW)}$ , where  $\omega_j$  is the corresponding frequency.

In our approach, we compute the minimum energy  $E_{\min}^{(\alpha)}$  and the normal modes ( $\mathbf{Q}^\alpha$ ) of the excited state  $\alpha$ . The Hamiltonian for the excited state is

$$\mathcal{H}_\alpha = E_{\min}^{(\alpha)} + \frac{\hbar}{2} \mathbf{P}^{(\alpha)T} \omega_\alpha \mathbf{P}^{(\alpha)} + \frac{\hbar}{2} \mathbf{Q}^{(\alpha)T} \omega_\alpha \mathbf{Q}^{(\alpha)}, \quad (1)$$

where the matrix  $\omega_\alpha$  collects the frequencies of the excited state.

In order to derive the expressions for the Hamiltonians in term of the normal modes of the ground state, we employ Duschinsky transformation among mass-weighted normal modes,

$$\omega^{-\frac{1}{2}} \mathbf{Q} = \mathbb{J}_\alpha \omega_\alpha^{-\frac{1}{2}} \mathbf{Q}^{(\alpha)} + \omega^{-\frac{1}{2}} \mathbf{K}_\alpha, \quad (2)$$

where  $\omega$  is the diagonal matrix of the frequencies of the ground state,  $\mathbb{J}_\alpha$  is the orthogonal Duschinsky matrix, and  $\mathbf{K}_\alpha$  is a vector representing the displacement along the ground state normal modes to reach the excited state minimum. A similar transformation must be performed among momenta, to preserve the canonical commutation rules,

$$\omega^{\frac{1}{2}} \mathbf{P} = \mathbb{J}_\alpha \omega_\alpha^{\frac{1}{2}} \mathbf{P}^{(\alpha)}. \quad (3)$$

Now the final expression of the intra-state Hamiltonian is easily derived,

$$\mathcal{H}_\alpha = E_{\min}^{(\alpha)} + \frac{\hbar}{2} \mathbf{P}^T \omega \mathbf{P} + \frac{1}{2} \mathbf{Q}^T \mathbb{B}_\alpha \mathbf{Q} - \boldsymbol{\Lambda}_\alpha^T \mathbf{Q} + \frac{1}{2} \mathbf{K}_\alpha^T \mathbb{B}_\alpha \mathbf{K}_\alpha, \quad (4)$$

where the matrix  $\mathbb{B}_\alpha$  is defined as  $\mathbb{B}_\alpha = \hbar \omega^{-\frac{1}{2}} \mathbb{J}_\alpha \omega_\alpha^2 \mathbb{J}_\alpha^T \omega^{-\frac{1}{2}}$  and  $\boldsymbol{\Lambda}_\alpha = \mathbb{B}_\alpha \mathbf{K}_\alpha$ .
